# Supplementary material for: Guided self-assembly of microgels: from particle arrays to anisotropic nanostructures
Source: Royal Society of Chemistry journal article supplement (doi:10.1039/c1sm05675a), 2011-01-01
Supplement: c1sm05675a.pdf [file c1sm05675a.pdf]

# Guided Self-Assembly of Microgels: From Particle Arrays to Anisotropic Nanostructures

Stephanie Hiltl,<sup>†</sup> Marco-Philipp Schürings,<sup>†</sup> Andreea Balaceanu,<sup>‡</sup> Veronika  
Mayorga,<sup>‡</sup> Clemens Liedel,<sup>†</sup> Andrij Pich,<sup>\*,‡</sup> and Alexander Böker<sup>\*,†</sup>

*Lehrstuhl für Makromolekulare Materialien und Oberflächen, RWTH Aachen University, Aachen,  
and Functional and Interactive Polymers, DWI an der RWTH Aachen e.V., Aachen*

E-mail: pich@dwI.rwth-aachen.de; boeker@dwI.rwth-aachen.de

## Electronic Supporting Information

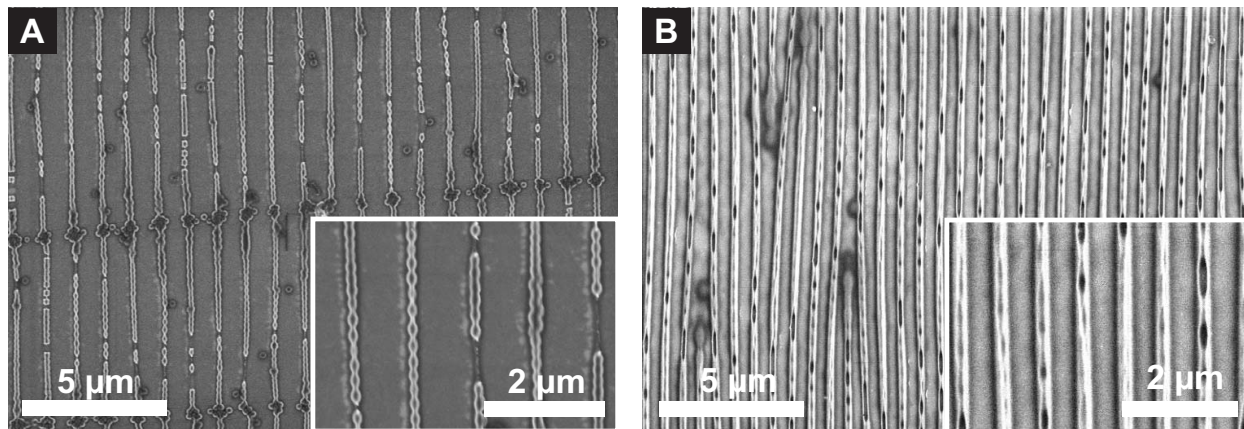

Figure 1: Scanning electron microscopy images of VCL/AAEM (A) and NiPAAm/VCL (B) printed on silicon wafers using wrinkles with  $\lambda=850$  and  $\lambda=750$  nm, respectively. Data corresponds to Figure 4.

\*To whom correspondence should be addressed

<sup>†</sup>RWTH Aachen University

<sup>‡</sup>DWI
